# Supplementary material for: Whole mitochondrial genome sequencing of Malaysian patients with cardiomyopathy
Source: PeerJ. 2022 Apr 14;10:e13265. doi: 10.7717/peerj.13265 (PMC9013480; doi:10.7717/peerj.13265)
Supplement: Supplemental Information 1 [file peerj-10-13265-s001.xlsx]

## Sheet: Table S1
Table S1: The scoring and classification of pathogenicity of in-silico tools used in this study.
Prediction tool/ Meta predictor	Score	Pathogenicity
PolyPhen-2	>0.957	Probably damaging
	>0.452 to 0.957	Possibly damaging
	≤0.452	Benign
SIFT	<0.05	Deleterious
	≥0.05	Tolerated
PROVEAN	≤ -2.5	Deleterious
	> -2.5	Neutral
MutPred	>0.5	Pathogenic
	≤0.5	Benign
Mitoclass.1	No score, categorial only	Damaging
		Neutral
CADD	≥15	Deleterious
	<15	Neutral
FatHmm	≤ -3	Deleterious
	> -3	Neutral
PANTHER	≥0.5	Disease
	<0.5	Neutral
SNPs&GO	>0.5	Disease
	≤0.5	Neutral
PhD-SNP	≥0.5	Disease
	<0.5	Neutral
MToolBox	≥0.43	Deleterious
	<0.43	Neutral
APOGEE	>0.5	Pathogenic
	≤0.5	Neutral
MitoTIP	>16.25	Likely pathogenic
	12.66 – 16.25	Possibly pathogenic
	8.44 – 12.66	Possibly benign
	<8.44	Likely benign

## Sheet: Table S2
Table S2: List of ancestral variants.
No.	Variant
1	m.73A>G
2	m.146T>C
3	m.152T>C
4	m.195T>C
5	m.263A>G
6	m.750A>G
7	m.1438A>G
8	m.2706A>G
9	m.2885T>C
10	m.4769A>G
11	m.7028C>T
12	m.8701A>G
13	m.8860A>G
14	m.9540T>C
15	m.10398A>G
16	m.10873T>C
17	m.10915T>C
18	m.11719G>A
19	m.11914G>A
20	m.12705C>T
21	m.13105A>G
22	m.14766C>T
23	m.15326A>G
24	m.16129G>A
25	m.16187C>T
26	m.16189T>C
27	m.16223C>T
28	m.16278C>T
29	m.16311T>C
30	m.16519T>C

## Sheet: Table S3
Table S3: List of markers found at ≥80% in haplogroups.
No.	Variant
1	m.240A>G
2	m.373A>G
3	m.390A>T
4	m.479A>G
5	m.1009C>T
6	m.2218C>T
7	m.2359C>T
8	m.2772C>T
9	m.285C>T
10	m.3204C>T
11	m.3206C>T
12	m.3486C>T
13	m.447C>G
14	m.461C>T
15	m.537C>T
16	m.61C>A
17	m.2056G>A
18	m.2361G>A
19	m.3483G>A
20	m.4541G>A
21	m.4643G>A
22	m.5054G>A
23	m.62G>A
24	m.92G>A
25	m.930G>C
26	m.94G>A
27	m.1005T>C
28	m.125T>C
29	m.127T>C
30	m.1541T>C
31	m.1824T>C
32	m.246T>C
33	m.293T>C
34	m.318T>C
35	m.3290T>C
36	m.3336T>C
37	m.3644T>C
38	m.3766T>C
39	m.4047T>C
40	m.4386T>C
41	m.4639T>C
42	m.466T>C
43	m.4688T>G
44	m.471T>C
45	m.4856T>C
46	m.485T>C
47	m.4973T>C
48	m.5048T>C
49	m.5074T>C
50	m.5082T>C
51	m.5493T>C
52	m.5587T>C
53	m.5892T>C
54	m.6227T>C
55	m.6293T>C
56	m.6515T>C
57	m.681T>C
58	m.7581T>C
59	m.7759T>C
60	m.335delA
61	m.514_517delCACA
Note: Variants in this list were cross-checked with https://www.mitomap.org/foswiki/bin/view/MITOMAP/HaplogroupMarkersLtrNumLtr in July 2021.

## Sheet: Table S4
Table S4: List of top level haplogroup markers fulfil BA1.
No.	Variant
1	m.64C>T
2	m.93A>G
3	m.150C>T
4	m.151C>T
5	m.182C>T
6	m.198C>T
7	m.199T>C
8	m.200A>G
9	m.204T>C
10	m.207G>A
11	m.210A>G
12	m.215A>G
13	m.225G>A
14	m.228G>A
15	m.235A>G
16	m.239T>C
17	m.250T>C
18	m.310T>C
19	m.316G>A
20	m.456C>T
21	m.482T>C
22	m.489T>C
23	m.499G>A
24	m.513G>A
25	m.514_515delCA
26	m.709G>A
27	m.710T>C
28	m.827A>G
29	m.930G>A
30	m.980T>C
31	m.1048C>T
32	m.1598G>A
33	m.1719G>A
34	m.1811A>G
35	m.1888G>A
36	m.2416T>C
37	m.3010G>A
38	m.3027T>C
39	m.3438G>A
40	m.3480A>G
41	m.3537A>G
42	m.3552T>A
43	m.3606A>G
44	m.3666G>A
45	m.3693G>A
46	m.3705G>A
47	m.3796A>G
48	m.3915G>A
49	m.3970C>T
50	m.4048G>A
51	m.4071C>T
52	m.4086C>T
53	m.4164A>G
54	m.4216T>C
55	m.4232T>C
56	m.4248T>C
57	m.4491G>A
58	m.4529A>T
59	m.4580G>A
60	m.4715A>G
61	m.4820G>A
62	m.4823T>C
63	m.4824A>G
64	m.4833A>G
65	m.4850C>T
66	m.4883C>T
67	m.4977T>C
68	m.5108T>C
69	m.5147G>A
70	m.5178C>A
71	m.5231G>A
72	m.5351A>G
73	m.5417G>A
74	m.5442T>C
75	m.5460G>A
76	m.5465T>C
77	m.5471G>A
78	m.5773G>A
79	m.5814T>C
80	m.6026G>A
81	m.6071T>C
82	m.6185T>C
83	m.6221T>C
84	m.6253T>C
85	m.6260G>A
86	m.6392T>C
87	m.6455C>T
88	m.6620T>C
89	m.6680T>C
90	m.6719T>C
91	m.6776T>C
92	m.6815T>C
93	m.6827T>C
94	m.6962G>A
95	m.7055A>G
96	m.7196C>A
97	m.7274C>T
98	m.7598G>A
99	m.7684T>C
100	m.7771A>G
101	m.7789G>A
102	m.7853G>A
103	m.7867C>T
104	m.8027G>A
105	m.8251G>A
106	m.8269G>A
107	m.8271_8279delACCCCCTCT
108	m.8414C>T
109	m.8473T>C
110	m.8584G>A
111	m.8684C>T
112	m.8697G>A
113	m.8790G>A
114	m.8932C>T
115	m.8964C>T
116	m.9053G>A
117	m.9055G>A
118	m.9123G>A
119	m.9380G>A
120	m.9438G>A
121	m.9449C>T
122	m.9545A>G
123	m.9548G>A
124	m.9554G>A
125	m.9716T>C
126	m.9824T>C
127	m.9950T>C
128	m.10034T>C
129	m.10086A>G
130	m.10238T>C
131	m.10310G>A
132	m.10373G>A
133	m.10400C>T
134	m.10586G>A
135	m.10609T>C
136	m.10876A>G
137	m.11002A>G
138	m.11176G>A
139	m.11467A>G
140	m.11665C>T
141	m.11899T>C
142	m.11944T>C
143	m.12007G>A
144	m.12091T>C
145	m.12239C>T
146	m.12308A>G
147	m.12358A>G
148	m.12372G>A
149	m.12405C>T
150	m.12406G>A
151	m.12414T>C
152	m.12501G>A
153	m.12618G>A
154	m.12771G>A
155	m.12810A>G
156	m.12811T>C
157	m.12882C>T
158	m.13145G>A
159	m.13263A>G
160	m.13500T>C
161	m.13590G>A
162	m.13708G>A
163	m.13722A>G
164	m.13734T>C
165	m.13759G>A
166	m.13780A>G
167	m.13879T>C
168	m.13928G>C
169	m.13966A>G
170	m.14000T>A
171	m.14178T>C
172	m.14318T>C
173	m.14470T>C
174	m.14560G>A
175	m.14569G>A
176	m.14668C>T
177	m.14783T>C
178	m.14905G>A
179	m.15043G>A
180	m.15110G>A
181	m.15115T>C
182	m.15217G>A
183	m.15235A>G
184	m.15236A>G
185	m.15257G>A
186	m.15301G>A
187	m.15311A>G
188	m.15487A>T
189	m.15535C>T
190	m.15670T>C
191	m.15746A>G
192	m.15758A>G
193	m.15784T>C
194	m.15884G>A
195	m.15924A>G
196	m.16051A>G
197	m.16086T>C
198	m.16092T>C
199	m.16093T>C
200	m.16111C>T
201	m.16124T>C
202	m.16126T>C
203	m.16140T>C
204	m.16145G>A
205	m.16148C>T
206	m.16162A>G
207	m.16172T>C
208	m.16182A>C
209	m.16183A>C
210	m.16186C>T
211	m.16192C>T
212	m.16193C>T
213	m.16209T>C
214	m.16213G>A
215	m.16217T>C
216	m.16224T>C
217	m.16231T>C
218	m.16234C>T
219	m.16241A>G
220	m.16243T>C
221	m.16247A>G
222	m.16249T>C
223	m.16256C>T
224	m.16260C>T
225	m.16261C>T
226	m.16263T>C
227	m.16264C>T
228	m.16265A>C
229	m.16266C>A
230	m.16270C>T
231	m.16274G>A
232	m.16290C>T
233	m.16291C>T
234	m.16292C>T
235	m.16293A>G
236	m.16294C>T
237	m.16295C>T
238	m.16297T>C
239	m.16298T>C
240	m.16304T>C
241	m.16309A>G
242	m.16319G>A
243	m.16325T>C
244	m.16327C>T
245	m.16343A>G
246	m.16354C>T
247	m.16355C>T
248	m.16356T>C
249	m.16357T>C
250	m.16362T>C
251	m.16390G>A
252	m.16391G>A
253	m.16399A>G
254	m.16526G>A
255	m.16527C>T
Note: Variants in this list were cross-checked with https://www.mitomap.org/MITOMAP/ClinGenApproved in July 2021.

## Sheet: Table S5
Table S5: List of top level haplogroup markers fulfil BS1.
No.	Variant
1	m.89T>C
2	m.183A>G
3	m.242C>T
4	m.319T>C
5	m.417G>A
6	m.593T>C
7	m.1040T>C
8	m.1107T>C
9	m.1119T>C
10	m.1780T>C
11	m.2259C>T
12	m.3316G>A
13	m.3434A>G
14	m.3591G>A
15	m.3834G>A
16	m.3849G>A
17	m.4025C>T
18	m.4117T>C
19	m.4703T>C
20	m.4991G>A
21	m.5153A>G
22	m.5301A>G
23	m.5580T>C
24	m.5585G>A
25	m.5821G>A
26	m.5843A>G
27	m.5913G>A
28	m.5978A>G
29	m.6023G>A
30	m.6216T>C
31	m.6413T>C
32	m.6734G>A
33	m.6752A>G
34	m.6917G>A
35	m.6960C>T
36	m.7828A>G
37	m.7861T>C
38	m.8149A>G
39	m.8188A>G
40	m.8270_8278delCACCCCCTC
41	m.8392G>A
42	m.8784A>G
43	m.8838G>A
44	m.9180A>G
45	m.9377A>G
46	m.9667A>G
47	m.9947G>A
48	m.9966G>A
49	m.10084T>C
50	m.10320G>A
51	m.10397A>G
52	m.10640T>C
53	m.10834C>T
54	m.11172A>G
55	m.11215C>T
56	m.11253T>C
57	m.12279A>G
58	m.12346C>T
59	m.12361A>G
60	m.12477T>C
61	m.12634A>G
62	m.12879T>C
63	m.12940G>A
64	m.13104A>G
65	m.13135G>A
66	m.13254T>C
67	m.13395A>G
68	m.13626C>T
69	m.13740T>C
70	m.13827A>G
71	m.14007A>G
72	m.14025T>C
73	m.14040G>A
74	m.14110T>C
75	m.14180T>C
76	m.14323G>A
77	m.14364G>A
78	m.14577T>C
79	m.14693A>G
80	m.14755A>G
81	m.14872C>T
82	m.15148G>A
83	m.15172G>A
84	m.15314G>A
85	m.15346G>A
86	m.15497G>A
87	m.15927G>A
88	m.16108C>T
89	m.16136T>C
90	m.16144T>C
91	m.16153G>A
92	m.16184C>T
93	m.16189delT
94	m.16218C>T
95	m.16219A>G
96	m.16220A>C
97	m.16235A>G
98	m.16242C>T
99	m.16257C>A
100	m.16265A>G
101	m.16271T>C
102	m.16288T>C
103	m.16300A>G
104	m.16301C>T
105	m.16316A>G
106	m.16318A>T
107	m.16344C>T
108	m.16352T>C
109	m.16368T>C
	Note: Variants in this list were cross-checked with https://www.mitomap.org/MITOMAP/ClinGenApproved in July 2021.

## Sheet: Table S6
Table S6: List of variants in control region.
HV1	HV2	HV3	CR	Others
m.16075T>C	m.63T>C	m.451_452insT	m.52T>C	m.374A>G
m.16092T>A	m.66delG	m.463C>T	m.53G>A	m.5894A>C
m.16094T>C	m.66G>A	m.468C>T	m.54G>C	m.5894A>G
m.16105T>C	m.103G>A	m.490A>G	m.575C>T	m.8227T>C
m.16111C>A	m.146T>A	m.494C>G	m.16463A>G	m.8271_8272insCCC
m.16144T>A	m.193A>G	m.498C>T	m.16465C>T	m.8277T>C
m.16150C>T	m.214A>G	m.503A>G	m.16468T>C	m.15954A>C
m.16154T>C	m.231_232insATA	m.506C>T	m.16470G>A	m.5743C>G
m.16157T>C	m.237A>G	m.548C>T	m.16471G>A	m.5746G>A
m.16172T>A	m.248delA	m.567_568insCCCC	m.16473G>A	m.5772G>A
m.16174C>T	m.249A>G	m.567_568insCCCCC	m.16477G>A	m.5783G>A
m.16175A>C	m.259A>G	m.574A>G	m.16497A>G	m.5790C>A
m.16180_16181delAA	m.260G>A		m.16524A>G
m.16180_16182delAAA	m.271C>T
m.16180delA	m.285C>A
m.16181A>C	m.292T>C
m.16181A>G	m.294T>C
m.16182_16183insC	m.297A>C
m.16183_16184insC	m.298C>T
m.16183_16184insCCCC	m.301_302insC
m.16183_16184insT	m.301_302insCC
m.16214C>A	m.301_302insCCC
m.16233A>C	m.302_303insC
m.16242C>A	m.302_303insCC
m.16250C>T	m.302_303insCCC
m.16254A>G	m.302A>C
m.16266C>G	m.307_310delCCCT
m.16269A>G	m.308_310delCCT
m.16272A>G	m.308C>T
m.16272A>T	m.309_310delCT
m.16289A>G	m.30T>C
m.16293A>T	m.310_311insC
m.16299A>G	m.310_311insCC
m.16301C>G	m.310delT
m.16335A>G	m.329G>A
m.16381T>C	m.332C>T
	m.338C>T
Note: HV – hypervariable region; CR – control region; Others – variants located in heavy strand origin of replication, non-coding nucleotides and L-strand origin.
Variants in the list were cross-checked with https://www.mitomap.org/foswiki/bin/view/MITOMAP/PolymorphismsControl in July 2021.

## Sheet: Table S7
Table S7: Score of novel variants in each in-silico prediction tool.
No.	Variant	PolyPhen-2	PolyPhen-2 score	SIFT	SIFT score	PROVEAN	PROVEAN score	MutPred	MutPred score	Mitoclass.1	CADD	CADD score	FatHmm	FatHmm score	PANTHER	PANTHER score	SNPs&GO	SNPs&GO score	PhD-SNP	PhD-SNP score	MToolBox	MToolBox score	APOGEE	APOGEE score	MitoTIP	MitoTIP score	CI (%) Mitomaster	CI Mamit-tRNA
1	m.1108C>T	-	-	-	-	-	-	-	-	-	-	-	-	-	-	-	-	-	-	-	-	-	-	-	-	-	33.3	-
2	m.1731A>G	-	-	-	-	-	-	-	-	-	-	-	-	-	-	-	-	-	-	-	-	-	-	-	-	-	86.7	-
3	m.2465T>A	-	-	-	-	-	-	-	-	-	-	-	-	-	-	-	-	-	-	-	-	-	-	-	-	-	73.3	-
4	m.2473A>C	-	-	-	-	-	-	-	-	-	-	-	-	-	-	-	-	-	-	-	-	-	-	-	-	-	100	-
5	m.2475T>C	-	-	-	-	-	-	-	-	-	-	-	-	-	-	-	-	-	-	-	-	-	-	-	-	-	100	-
6	m.2479C>A	-	-	-	-	-	-	-	-	-	-	-	-	-	-	-	-	-	-	-	-	-	-	-	-	-	100	-
7	m.3511A>C	benign	0.001	tolerated	0.23	deleterious	-2.86	high pathogenicity	0.715	neutral	neutral	7.09	neutral	-0.24	neutral	0.225	neutral	0.138	neutral	0.494	neutral	0.19	neutral	0.34	-	-	40	-
8	m.3577A>C	benign	0.001	tolerated	0.36	neutral	-1.25	low pathogenicity	0.522	neutral	neutral	12.94	neutral	1.34	neutral	0.13	neutral	0.077	neutral	0.204	neutral	0.11	neutral	0.34	-	-	86.7	-
9	m.4313T>A	-	-	-	-	-	-	-	-	-	-	-	-	-	-	-	-	-	-	-	-	-	-	-	likely benign	4.76486	73.3	22/34
10	m.5551C>T	-	-	-	-	-	-	-	-	-	-	-	-	-	-	-	-	-	-	-	-	-	-	-	possibly benign	8.78951	80	22/34
11	m.7416T>C	probably damaging	0.997	tolerated	0.08	neutral	-1.06	low pathogenicity	0.464	damaging	deleterious	22.6	deleterious	-4.78	neutral	0.336	neutral	0.243	neutral	0.358	deleterious	0.69	neutral	0.35	-	-	80	-
12	m.8573G>C	possibly damaging	0.944	deleterious	0	deleterious	-4.82	low pathogenicity	0.48	damaging	deleterious	19.9	neutral	0.1	neutral	0.499	neutral	0.375	disease	0.525	deleterious	0.64	pathogenic	0.57	-	-	93.3	-
13	m.9318C>A	benign	0.334	tolerated	1	neutral	-0.01	low pathogenicity	0.555	neutral	neutral	8.64	neutral	0.94	neutral	0.08	neutral	0.042	neutral	0.196	neutral	0.26	neutral	0.31	-	-	26.7	-
14	m.10144G>T	benign	0.025	tolerated	0.69	neutral	3.54	low pathogenicity	0.514	neutral	neutral	5.92	neutral	-0.59	neutral	0.108	neutral	0.086	neutral	0.419	neutral	0.16	neutral	0.25	-	-	6.7	-
15	m.11916T>A	probably damaging	0.976	deleterious	0.02	deleterious	-2.51	high pathogenicity	0.806	neutral	deleterious	24	neutral	-2.29	disease	0.612	neutral	0.214	disease	0.516	deleterious	0.75	pathogenic	0.56	-	-	93.3	-
16	m.11918T>G	possibly damaging	0.948	deleterious	0.02	deleterious	-2.67	low pathogenicity	0.519	damaging	deleterious	23.2	neutral	-1.43	disease	0.658	neutral	0.256	neutral	0.359	deleterious	0.67	neutral	0.35	-	-	80	-
17	m.12595A>G	benign	0.001	tolerated	0.23	neutral	-1.05	low pathogenicity	0.403	neutral	neutral	0.22	neutral	0.87	neutral	0.211	neutral	0.09	neutral	0.34	neutral	0.12	neutral	0.28	-	-	60	-
18	m.12663C>A	benign	0.317	deleterious	0.03	neutral	-1.72	low pathogenicity	0.521	neutral	deleterious	18.95	neutral	1.1	neutral	0.368	neutral	0.211	neutral	0.256	neutral	0.28	neutral	0.34	-	-	20	-

## Sheet: Table S8
Table S8: List of CMP and/or mitochondrial disease-associated variants belonged to mtDNA haplogroup of proband.
Variant	Gene	Complex	AA change	MITOMAP AF	gnomAD AF	Haplogroup variant	CMP patients
							Frequency, n (%)			Haplogroup
							DCM (N=87)	HCM (N=58)	Total (N=145)
m.2755A>G	MT-RNR2	-	-	0.0052	0.0034	R8, L, U5b2b3	2 (2.3)	0 (0.0)	2 (1.4)	R8a1
m.3497C>T	MT-ND1	I	Ala → Val	0.0037	0.0005	B4c	4 (4.6)	3 (5.2)	7 (4.8)	B4c1b2a
m.3571C>T	MT-ND1	I	Leu → Phe	0.0024	0.0004	B4c	4 (4.6)	3 (5.2)	7 (4.8)	B4c1b2a
m.4079A>G	MT-ND1	I	Tyr → Cys	0.0005	0.0003	M33c	1 (1.1)	0 (0.0)	1 (0.7)	M33c
m.5076C>T	MT-ND2	I	Leu → Phe	0.0043	0.0006	F3b1	1 (1.1)	0 (0.0)	1 (0.7)	F3b1a
m.5319A>G	MT-ND2	I	Thr → Ala	0.003	0.0023	H5a, M1a1b1a, M5c, M6a1b, U5a1a2a	0 (0.0)	2 (3.4)	2 (1.4)	M5c1
m.5466A>G	MT-ND2	I	Thr → Ala	0.0005	0.0003	D4a3	0 (0.0)	1 (1.7)	1 (0.7)	D4a3a
m.8396A>G	MT-ATP8	V	Thr → Ala	0.0019	0.0007	M2a1	0 (0.0)	2 (3.4)	2 (1.4)	M2a1
m.12338T>C	MT-ND5	I	Met → Thr (Start lost)	0.0035	0.0012	F2	1 (1.1)	2 (3.4)	3 (2.1)	F2
m.12850A>G	MT-ND5	I	Ile → Val	0.0007	0.0002	M74a	1 (1.1)	0 (0.0)	1 (0.7)	M74a
m.13802C>T	MT-ND5	I	Thr → Met	0.0006	0.0007	M50a1, U5a1c1	1 (1.1)	0 (0.0)	1 (0.7)	M50a1
m.14149C>T	MT-ND6	I	Term =	0.0012	0.0004	B5a2a, H44a	1 (1.1)	0 (0.0)	1 (0.7)	B5a2a1a
m.15024G>A	MT-CYB	III	Cys → Tyr	0.0006	0.0001	F1e	1 (1.1)	0 (0.0)	1 (0.7)	F1e3

## Sheet: Table S9
Table S9: Score of CMP and/or mitochondrial disease-associated variants belonged to mtDNA haplogroup of proband.
No	Variant	PolyPhen-2	PolyPhen-2 score	SIFT	SIFT score	PROVEAN	PROVEAN score	MutPred	MutPred score	Mitoclass.1	CADD	CADD score	FatHmm	FatHmm score	PANTHER	PANTHER score	SNPs&GO	SNPs&GO score	PhD-SNP	PhD-SNP score	MToolBox	MToolBox score	APOGEE	APOGEE score	MitoTIP	MitoTIP score	CI (%) Mitomaster	CI Mamit-tRNA
1	m.2755A>G	-	-	-	-	-	-	-	-	-	-	-	-	-	-	-	-	-	-	-	-	-	-	-	-	-	46.7	-
2	m.3497C>T	benign	0.002	tolerated	0.25	neutral	-1.4	low pathogenicity	0.413	neutral	neutral	11.99	neutral	-2.06	neutral	0.16	neutral	0.06	neutral	0.356	neutral	0.12	neutral	0.44	-	-	20	-
3	m.3571C>T	probably damaging	0.984	deleterious	0.01	deleterious	-2.87	low pathogenicity	0.625	neutral	deleterious	23.4	neutral	-2.83	neutral	0.199	neutral	0.058	neutral	0.422	deleterious	0.67	neutral	0.23	-	-	86.7	-
4	m.4079A>G	benign	0	deleterious	0.04	neutral	-0.4	low pathogenicity	0.433	neutral	neutral	6.84	neutral	-1.91	neutral	0.35	neutral	0.21	neutral	0.293	neutral	0.15	neutral	0.39	-	-	13.3	-
5	m.5076C>T	benign	0.012	tolerated	0.1	deleterious	-2.86	low pathogenicity	0.6	neutral	neutral	10.14	neutral	-0.6	disease	0.78	neutral	0.242	disease	0.622	neutral	0.26	neutral	0.39	-	-	86.7	-
6	m.5319A>G	benign	0	deleterious	0.03	neutral	-0.38	low pathogenicity	0.506	neutral	deleterious	16.83	neutral	0.04	neutral	0.49	neutral	0.129	neutral	0.256	neutral	0.15	neutral	0.38	-	-	6.7	-
7	m.5466A>G	benign	0.027	deleterious	0.01	neutral	-0.65	low pathogenicity	0.533	neutral	deleterious	17.33	neutral	0.72	neutral	0.422	neutral	0.048	neutral	0.238	neutral	0.15	neutral	0.3	-	-	26.7	-
8	m.8396A>G	possibly damaging	0.955	deleterious	0.03	neutral	-1.88	low pathogenicity	0.422	neutral	deleterious	16.93	neutral	-1.47	neutral	0.322	neutral	0.083	neutral	0.478	deleterious	0.67	neutral	0.4	-	-	33.3	-
9	m.12338T>C	-	-	deleterious	0	deleterious	-3.8	high pathogenicity	0.966	damaging	neutral	11.23	neutral	-0.75	-	-	neutral	0.147	neutral	0.417	deleterious	0.49	pathogenic	0.61	-	-	66.7	-
10	m.12850A>G	possibly damaging	0.925	tolerated	0.66	neutral	-0.52	low pathogenicity	0.559	neutral	neutral	5.29	neutral	-0.23	disease	0.503	neutral	0.076	neutral	0.127	deleterious	0.63	neutral	0.33	-	-	60	-
11	m.13802C>T	probably damaging	0.995	tolerated	0.22	neutral	-2.46	low pathogenicity	0.6	neutral	deleterious	21.2	neutral	0.16	disease	0.658	neutral	0.374	neutral	0.271	deleterious	0.73	neutral	0.36	-	-	53.3	-
12	m.14149C>T	-	-	-		-	-	-	-	-	-	-	-	-	-	-	-	-	-	-	-	-	-	-	-	-	N/A	-
13	m.15024G>A	probably damaging	1	deleterious	0	deleterious	-9.46	low pathogenicity	0.642	damaging	deleterious	23.1	deleterious	-3.08	disease	0.662	disease	0.856	disease	0.715	deleterious	0.87	pathogenic	0.63	-	-	100	-

## Sheet: Table S10
Table S10: Score of CMP and/or mitochondrial disease-associated variants in each in-silico prediction tool.
No	Variant	PolyPhen-2	PolyPhen-2 score	SIFT	SIFT score	PROVEAN	PROVEAN score	MutPred	MutPred score	Mitoclass.1	CADD	CADD score	FatHmm	FatHmm score	PANTHER	PANTHER score	SNPs&GO	SNPs&GO score	PhD-SNP	PhD-SNP score	MToolBox	MToolBox score	APOGEE	APOGEE score	MitoTIP	MitoTIP score	CI (%) Mitomaster	CI Mamit-tRNA
1	m.1555A>G	-	-	-	-	-	-	-	-	-	-	-	-	-	-	-	-	-	-	-	-	-	-	-	-	-	73.3	-
2	m.2905A>G	-	-	-	-	-	-	-	-	-	-	-	-	-	-	-	-	-	-	-	-	-	-	-	-	-	60	-
3	m.3202T>C	-	-	-	-	-	-	-	-	-	-	-	-	-	-	-	-	-	-	-	-	-	-	-	-	-	46.7	-
4	m.3397A>G	benign	0.101	deleterious	0.01	deleterious	-3.48	high pathogenicity	0.723	damaging	neutral	8.38	neutral	-0.83	-	-	disease	0.734	disease	0.785	neutral	0.42	pathogenic	0.94	-	-	86.7	-
5	m.4316A>G	-	-	-	-	-	-	-	-	-	-	-	-	-	-	-	-	-	-	-	-	-	-	-	possibly benign	11.0664	93.3	31/34
6	m.6340C>T	benign	0.025	deleterious	0.02	neutral	-1.85	low pathogenicity	0.597	damaging	deleterious	15.59	neutral	0.56	neutral	0.211	neutral	0.145	neutral	0.326	neutral	0.18	pathogenic	0.51	-	-	80	-
7	m.9025G>A	probably damaging	1	deleterious	0.01	deleterious	-5.34	high pathogenicity	0.86	damaging	deleterious	23.9	deleterious	-5.94	disease	0.896	disease	0.778	disease	0.582	deleterious	0.89	neutral	0.3	-	-	100	-
8	m.9214A>C	possibly damaging	0.945	deleterious	0.01	deleterious	-4.11	low pathogenicity	0.385	damaging	deleterious	23.2	neutral	-1.52	-	-	neutral	0.283	disease	0.676	deleterious	0.72	pathogenic	0.57	-	-	100	-
9	m.9804G>A	benign	0.006	tolerated	0.06	deleterious	-3.26	high pathogenicity	0.708	damaging	deleterious	18.38	neutral	-0.32	neutral	0.204	neutral	0.469	disease	0.611	neutral	0.25	pathogenic	0.86	-	-	93.3	-
10	m.9856T>C	benign	0	tolerated	0.15	neutral	-2.24	low pathogenicity	0.457	neutral	neutral	5.83	neutral	-1.78	neutral	0.186	neutral	0.129	neutral	0.398	neutral	0.14	neutral	0.47	-	-	20	-
11	m.10237T>C	probably damaging	0.991	deleterious	0	deleterious	-4.68	low pathogenicity	0.551	damaging	deleterious	22.9	deleterious	-3.14	disease	0.53	neutral	0.458	disease	0.592	deleterious	0.77	pathogenic	0.79	-	-	100	-
12	m.11084A>G	probably damaging	0.994	tolerated	1	neutral	-1.32	low pathogenicity	0.482	neutral	neutral	8.31	neutral	-1.26	-	-	neutral	0.063	neutral	0.099	deleterious	0.66	pathogenic	0.94	-	-	73.3	-
13	m.11087T>C	probably damaging	0.976	deleterious	0.01	deleterious	-4.63	high pathogenicity	0.788	damaging	deleterious	23.5	neutral	-1.68	-	-	disease	0.599	neutral	0.499	deleterious	0.81	neutral	0.41	-	-	100	-
14	m.11361T>C	possibly damaging	0.949	tolerated	0.12	deleterious	-3.55	low pathogenicity	0.669	neutral	neutral	14.83	neutral	-0.94	neutral	0.315	neutral	0.287	neutral	0.475	deleterious	0.71	neutral	0.4	-	-	73.3	-
15	m.11778G>A	probably damaging	0.999	deleterious	0	deleterious	-4.74	high pathogenicity	0.852	damaging	deleterious	24.4	deleterious	-3.75	disease	0.631	disease	0.549	disease	0.715	deleterious	0.85	pathogenic	0.97	-	-	100	-
16	m.14420C>T	probably damaging	0.995	deleterious	0.02	neutral	-0.16	low pathogenicity	0.518	neutral	deleterious	18.18	neutral	0.2	neutral	0.134	neutral	0.275	neutral	0.277	deleterious	0.66	neutral	0.38	-	-	26.7	-
17	m.14894T>C	probably damaging	0.997	deleterious	0.03	deleterious	-3.94	low pathogenicity	0.608	neutral	deleterious	16.47	neutral	0.44	neutral	0.251	neutral	0.199	neutral	0.455	deleterious	0.71	neutral	0.22	-	-	100	-
